# Supplementary material for: Voltammetric Sensor for Doxorubicin Determination Based on Self-Assembled DNA-Polyphenothiazine Composite
Source: MDPI journal article supplement (doi:10.3390/nano13162369), 2023-08-18
Supplement: s1 [file s1]

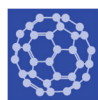

# Voltammetric Sensor for Doxorubicin Determination Based on Self-Assembled DNA-Polyphenothiazine Composite

Anastasiya Malanina <sup>1</sup>, Yurii Kuzin <sup>1</sup>, Alena Khadieva <sup>1</sup>, Kseniya Shibaeva <sup>1</sup>, Pavel Padnya <sup>1,\*</sup>, Ivan Stoikov <sup>1</sup> and Gennady Evtugyn <sup>1,2,\*</sup>

<sup>1</sup> A.M. Butlerov' Chemistry Institute, Kazan Federal University, 18 Kremlevskaya Street, Kazan 420008, Russia; malanast@mail.ru (A.M.); yzinkyra@mail.ru (Y.K.); aljoihadieva@kpfu.ru (A.K.); ksshibaeva@kpfu.ru (K.S.); ivan.stoikov@mail.ru (I.S.)

<sup>2</sup> Analytical Chemistry Department, Chemical Technology Institute, Ural Federal University, 19 Mira Street, Ekaterinburg 620002, Russia

\* Correspondence: padnya.ksu@gmail.com (P.P.); gennady.evtugyn@kpfu.ru (G.E.)

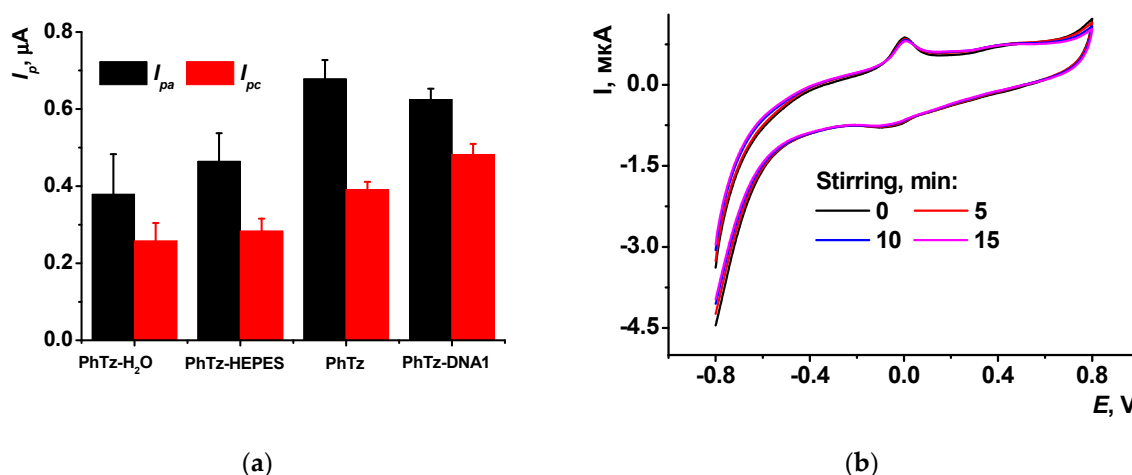

**Figure S1.** (a) The dependence of the polyPhTz peak currents on the incubation of the GCE/polyPhTz sensors in water and HEPES. Average  $\pm$  S.D. for five sensors, incubation 20 min; (b) Cyclic voltammograms recorded in 0.1 M HEPES + 0.1 M NaNO<sub>3</sub>, pH 7.0, scan rate 100 mV/s, with intermediate stirring the solution.

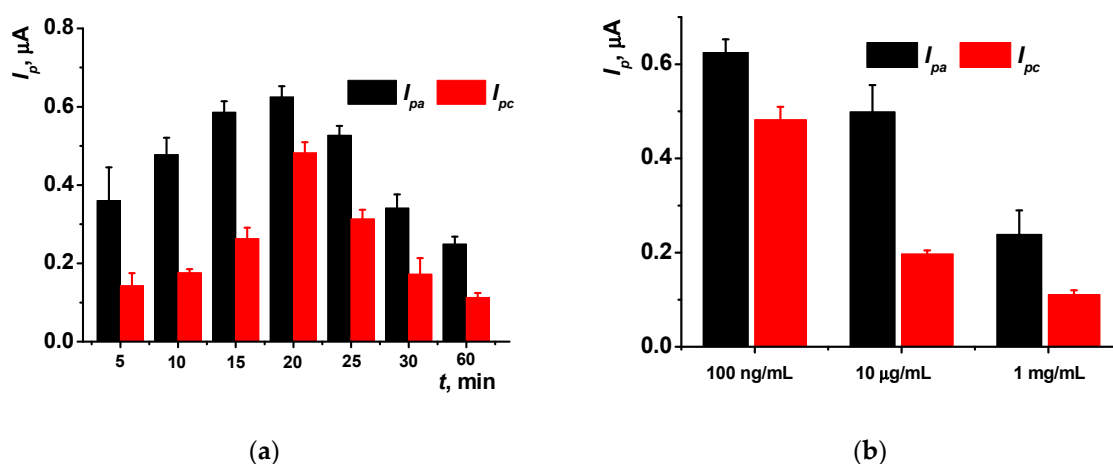

**Figure S2.** (a) The dependence of the polyPhTz peak currents on the incubation time of the GCE/polyPhTz sensors in 0.1 M HEPES; (b) The polyPhTz peak currents after 15 min incubation of the GCE/polyPhTz sensor in DNA1 solution of various concentration. Average  $\pm$  S.D. for five sensors.

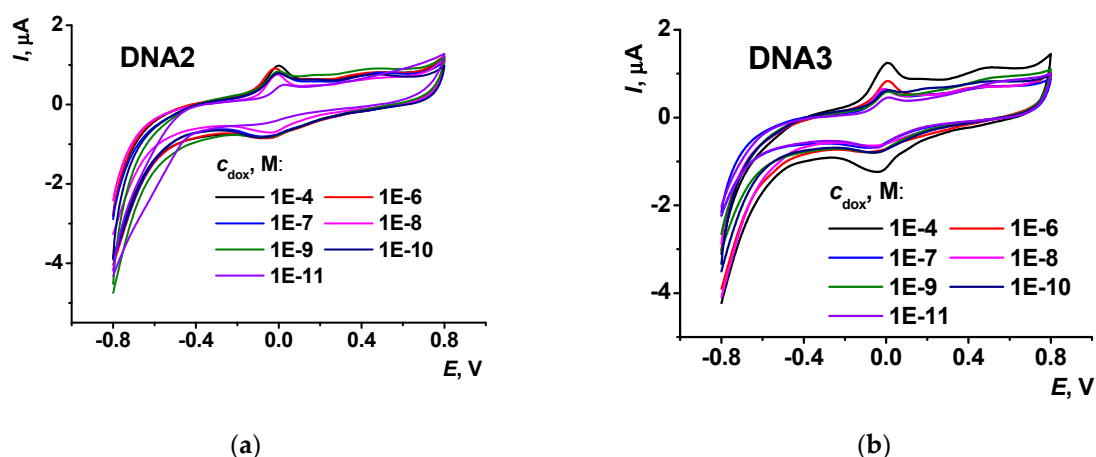

**Figure S3.** Cyclic voltammograms recorded after incubation of the GCE/polyPhTz/DNA sensor in doxorubicin solution. (a) DNA from fish sperm; (b) DNA from chicken erythrocytes.

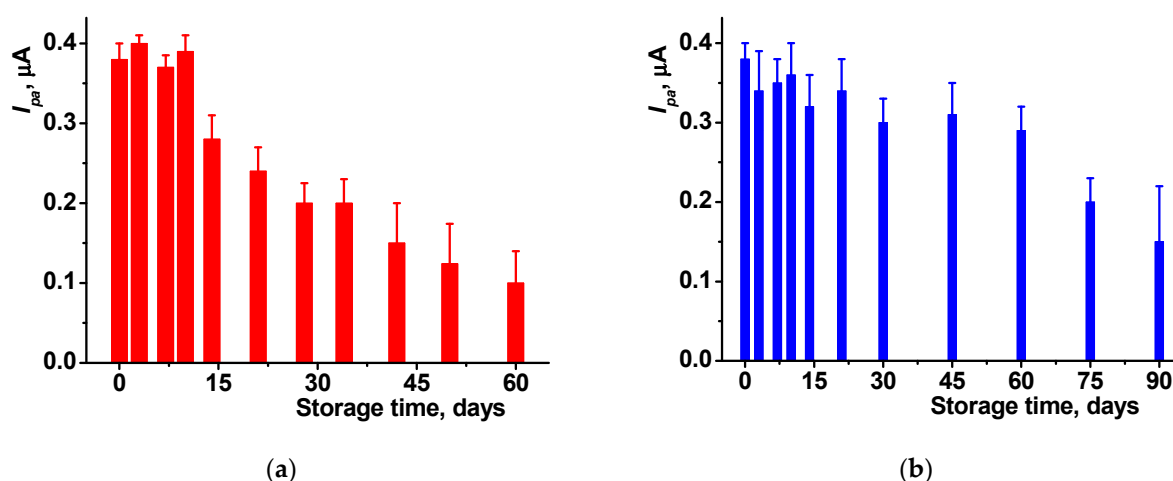

**Figure S4.** Anodic peak currents on cyclic voltammograms recorded after incubation of the GCE/polyPhTz/DNA (0.1 mg/mL DNA) sensor in 0.1 nM doxorubicin solution. (a) Storage in 0.1 M HEPES buffer at 4 °C; (b) Storage in dry conditions at 4 °C. Average  $\pm$  S.D. for five individual sensors

**Table 1.** Analytical characteristics of the determination of doxorubicin with electrochemical sensors and DNA sensors.

| Electrode / Modifier                                                                                     | Concentration range, $\mu\text{M}$ | LOD, nM | Ref  |
|----------------------------------------------------------------------------------------------------------|------------------------------------|---------|------|
| Electrochemical sensors                                                                                  |                                    |         |      |
| ZnO /graphite paste electrode                                                                            | 0.07–5000                          | 9.0     | [s1] |
| GCE/mesoporous carbon nanospheres / reduced graphene oxide                                               | 0.01–10                            | 1.5     | [s2] |
| Pyrographite                                                                                             | 0.01–1.0                           | 10      | [s3] |
| Pt/ Silver solid amalgam                                                                                 | 0.6–10                             | 440     | [s4] |
| Carbon paste electrode with implemented TiO <sub>2</sub> nanoparticles and multi-walled carbon nanotubes | 5.0–35.0                           | 1300    | [s5] |
| Screen-printed carbon electrode /MgO/carbon nanodots/                                                    | 0.1–1.0                            | 90      | [s6] |
| GCE/ Tryptophan / polyethylene glycol / CoFe <sub>2</sub> O <sub>4</sub> nanoparticles                   | 0.06–2.0                           | 30      | [s7] |
| Electrochemical DNA sensors                                                                              |                                    |         |      |

|                                                                            |                           |        |           |
|----------------------------------------------------------------------------|---------------------------|--------|-----------|
| GCE / poly(Azure B)                                                        | 0.0001–0.1                | 0.07   | [s8]      |
| GCE/Polyaniline/DNA                                                        | 1·10 <sup>-6</sup> –1000  | 0.0006 | [s9]      |
| GCE / carbon nanotubes–polylysine                                          | 0.0025–0.25               | 1.0    | [s10]     |
| GCE / poly(Neutral red)                                                    | 0.0001–0.1                | 50     | [s11]     |
| GCE / acridine yellow (monomer)                                            | 1·10 <sup>-5</sup> –0.001 | 0.7    | [s12]     |
| GCE—poly(Methylene blue) -poly(Neutral red)                                | 0.0005–1000               | 0.13   | [s13]     |
| Screen-printed carbon electrode/ Pt nanoparticles / Ag nanoparticles / DNA | 0.2–2.0                   | -      | [s14]     |
| GCE / Single-walled carbon nanotubes                                       | 0.001–20                  | 0.6    | [s15]     |
| Boron doped diamond electrode / DNA aptamer                                | Up to 2.3                 | 49     | [s16]     |
| GCE/PolyPhTz/DNA                                                           | 0.01–200                  | 0.005  | This work |

[s1] Alavi-Tabari, S.A.R.; Khalilzadeh, M.A.; Karimi-Maleh, H. Simultaneous determination of doxorubicin and dasatinib as two breast anticancer drugs uses an amplified sensor with ionic liquid and ZnO nanoparticle. *J. Electroanal. Chem.* **2018**, *811*, 84–88. doi:10.1016/j.jelechem.2018.01.034.

[s2] Liu, J.; Bo, X.; Zhou, M.; Guo, L. A nanocomposite prepared from metal-free mesoporous carbon nanospheres and graphene oxide for voltammetric determination of doxorubicin. *Microchim. Acta* **2019**, *186*, 639, doi:10.1007/s00604-019-3754-5

[s3] Vacek, J.; Havran, L.; Fojta, M. Ex situ voltammetry and chronopotentiometry of doxorubicin at a pyrolytic graphite electrode: Redox and catalytic properties and analytical applications. *Electroanalysis* **2009**, *21*, 21399–22144, doi:10.1002/elan.200904646.

[s4] Skalová, Š.; Langmaier, J.; Barek, J.; Vyskočil, V.; Navrátil, T. Doxorubicin determination using two novel voltammetric approaches: A comparative study. *Electrochim. Acta* **2020**, *330*, 135180. doi: 10.1016/j.electacta.2019.135180.

[s5] Ali, A.-M.B.H.; Rageh, A.H.; Abdel-aal, F.A.M.; Mohamed, A.-M.I. Anatase titanium oxide nanoparticles and multi-walled carbon nanotubes-modified carbon paste electrode for simultaneous determination of avanafil and doxorubicin in plasma samples. *Microchem. J.* **2023**, *185*, 108261. <https://doi.org/10.1016/j.microc.2022.108261>.

[s6] Singh, T.A.; Sharma, V.; Thakur, N.; Tejwan, N.; Sharma, A.; Das, J. Selective and sensitive electrochemical detection of doxorubicin via a novel magnesium oxide/carbon dot nanocomposite based sensor. *Inorg. Chem. Commun.* **2023**, *150*, 110527. <https://doi.org/10.1016/j.inoche.2023.110527>.

[s7] Abbasi, M.; Ezazi, M.; Jouyban, A.; Lulek, E.; Asadpour-Zeynali, K.; Ertas, Y.N.; Houshyar, J.; Mokhtarzadeh, A.; Soleymani, J. An ultrasensitive and preprocessing-free electrochemical platform for the detection of doxorubicin based on tryptophan/polyethylene glycol-cobalt ferrite nanoparticles modified electrodes. *Microchem. J.* **2022**, *183*, 108055. <https://doi.org/10.1016/j.microc.2022.108055>.

[s8] Porfireva, A.; Vorobev, V.; Babkina, S.; Evtugyn, G. Electrochemical sensor based on poly(Azure B)-DNA composite for doxorubicin determination. *Sensors* **2019**, *19*, 2085. doi: 10.3390/s19092085.

[s9] Kulikova, T.; Porfireva, A.; Evtugyn, G.; Hianik, T. Electrochemical DNA sensors with layered polyaniline-DNA coating for detection of specific DNA interactions. *Sensors* **2019**, *19*, 469, doi:10.3390/s19030469.

[s10] Peng, A.; Xu, H.; Luo, C.; Ding, H. Application of a disposable doxorubicin sensor for direct determination of clinical drug concentration in patient blood. *Int. J. Electrochem. Sci.* **2016**, *11*, 6266–6278, doi:10.20964/2016.07.38.

[s11] Evtugyn, G.; Porfireva, A.; Stepanova, V.; Budnikov, H. Electrochemical biosensors based on native DNA and nanosized mediator for the detection of anthracycline preparations. *Electroanalysis* **2015**, *27*, 629–637. DOI: 10.1002/elan.201400564.

- [s12] Kulikova, T.; Porfireva, A.; Rogov, A.; Evtugyn, G. Electrochemical DNA sensor based on acridine yellow adsorbed on glassy carbon electrode. *Sensors* **2021**, *21*, 7763. DOI: 10.3390/s21227763.
- [s13] Kappo, D.; Shurpik, D.; Padnya, P.; Stoikov, I.; Rogov, A.; Evtugyn, G. Electrochemical DNA sensor based on carbon black-poly(methylene blue)-poly(neutral red) composite. *Biosensors* **2022**, *12*, 329. DOI: 10.3390/bios12050329
- [s14] Karadurmus, L.; Dogan-Topal, B.; Kurbanoglu, S.; Shah, A.; Ozkan, S.A. The interaction between DNA and three intercalating anthracyclines using electrochemical DNA nanobiosensor based on metal nanoparticles modified screen-printed electrode. *Micromachines* **2021**, *12*, 1337; <https://doi.org/10.3390/mi12111337>.
- [s15] Moghadam, F. H.; Taher, M.A.; Karimi-Maleh, H. Doxorubicin anticancer drug monitoring by ds-DNA-based electrochemical biosensor in clinical samples. *Micromachines* **2021**, *12*, 808; doi: 10.3390/mi12070808.
- [s16] Asai, K.; Yamamoto, T.; Nagashima, S.; Ogata, G.; Hibino, H.; Einaga, Y. An electrochemical aptamer-based sensor prepared by utilizing the strong interaction between a DNA aptamer and diamond. *Analyst* **2020**, *145*, 544–549. DOI: 10.1039/c9an01976
